# Supplementary material
Source: PubMed Central journal article supplement (PMC7790849)
Supplement: NIHMS1643292-supplement-Supplement.pdf [file NIHMS1643292-supplement-Supplement.pdf]

**Supplementary Figure S1.** Project Viva participant dual-energy X-ray absorptiometry (DXA) scan (left) with highlighted DXA measures (right)

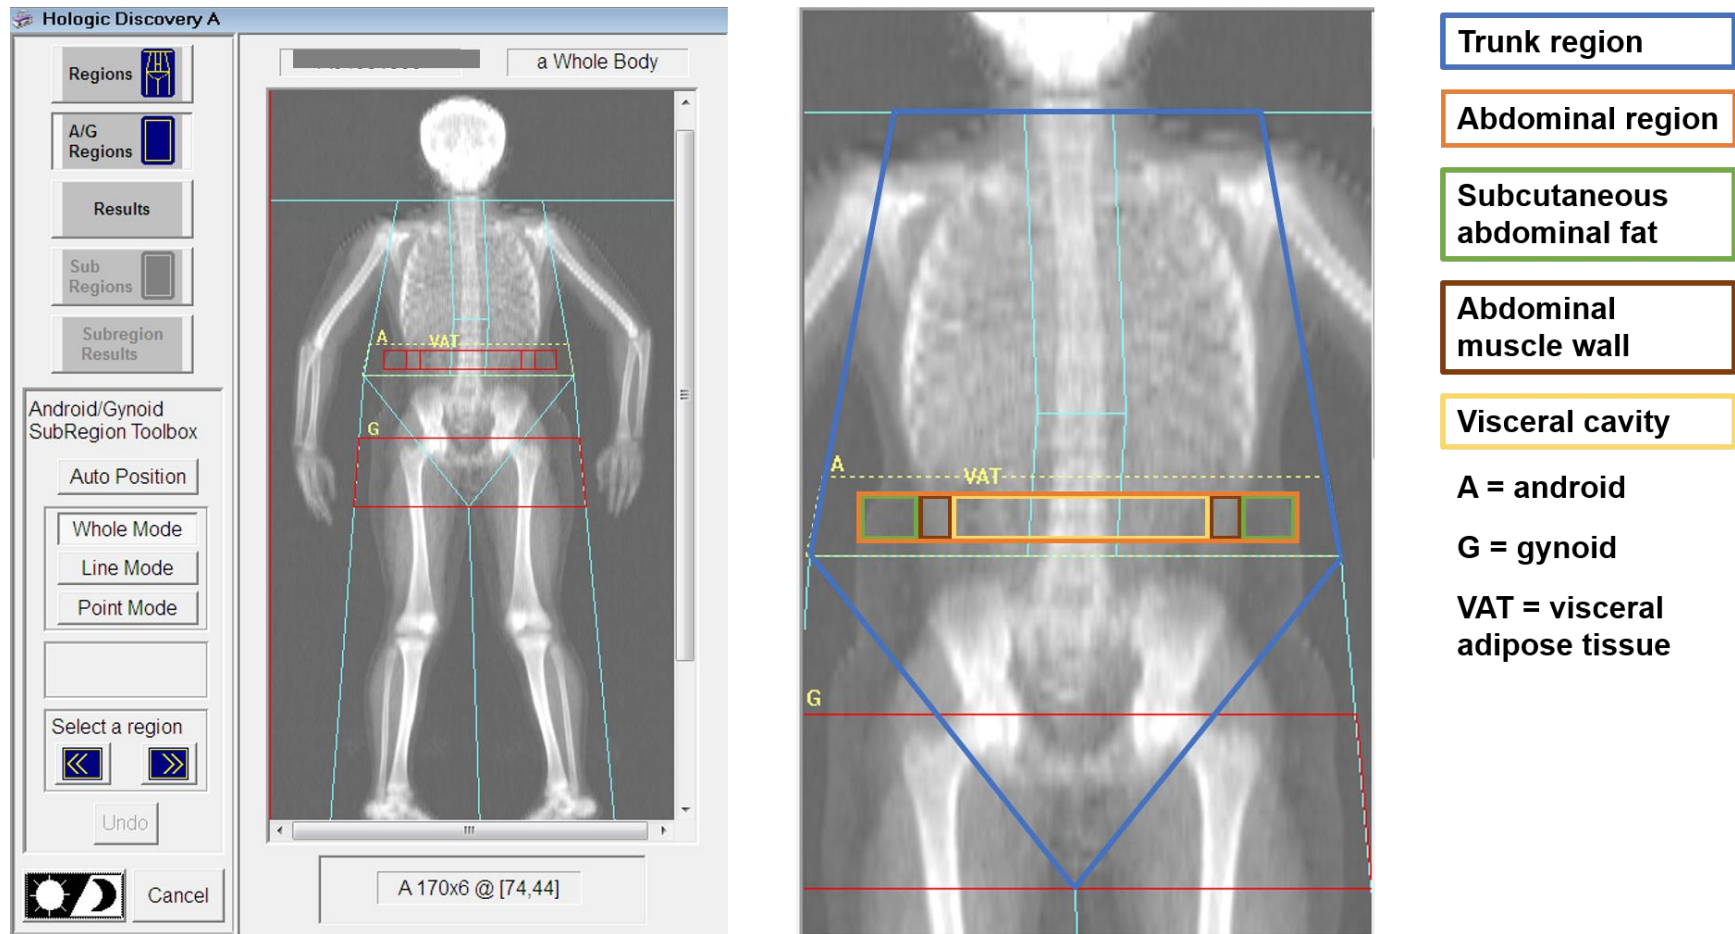

Reference: Hologic. Horizon Bone Densitometry System User Guide.

**Supplementary Table S1.** Cross-sectional associations of visceral adipose tissue (VAT), subcutaneous abdominal adipose tissue (SAAT), and total abdominal adipose tissue (TAAT) sex-specific standard deviation score (SDS) with cardio-metabolic risk and related markers; sex-stratified analyses

|                        | Girls<br>β (95% CI)    |                      |                        |                      |                      | Boys<br>β (95% CI)     |                      |                        |                      |                      |
|------------------------|------------------------|----------------------|------------------------|----------------------|----------------------|------------------------|----------------------|------------------------|----------------------|----------------------|
|                        | <i>N</i><br><i>Obs</i> | Model 1              | <i>N</i><br><i>Obs</i> | Model 2              | Model 3              | <i>N</i><br><i>Obs</i> | Model 1              | <i>N</i><br><i>Obs</i> | Model 2              | Model 3              |
| <b>VAT area SDS</b>    |                        |                      |                        |                      |                      |                        |                      |                        |                      |                      |
| Metabolic risk z-score | 232                    | 0.25 (0.20, 0.30)    | 230                    | 0.24 (0.19, 0.29)    | 0.12 (0.05, 0.20)    | 250                    | 0.29 (0.23, 0.34)    | 249                    | 0.29 (0.23, 0.34)    | 0.16 (0.07, 0.24)    |
| SBP z-score            | 371                    | 0.02 (-0.07, 0.10)   | 369                    | -0.00 (-0.09, 0.09)  | -0.07 (-0.21, 0.07)  | 363                    | 0.08 (0.01, 0.16)    | 362                    | 0.06 (-0.02, 0.14)   | -0.01 (-0.14, 0.11)  |
| Log HDL-C, mg/dL       | 252                    | -0.06 (-0.08, -0.03) | 250                    | -0.06 (-0.08, -0.03) | -0.02 (-0.07, 0.02)  | 282                    | -0.07 (-0.10, -0.04) | 281                    | -0.08 (-0.10, 0.05)  | -0.03 (-0.07, 0.02)  |
| Log TG, mg/dL          | 252                    | 0.08 (0.04, 0.13)    | 250                    | 0.10 (0.05, 0.15)    | 0.11 (0.04, 0.19)    | 282                    | 0.09 (0.04, 0.14)    | 281                    | 0.09 (0.04, 0.15)    | 0.02 (-0.07, 0.11)   |
| Log HOMA-IR, units     | 234                    | 0.28 (0.22, 0.34)    | 232                    | 0.25 (0.19, 0.31)    | 0.12 (0.02, 0.22)    | 255                    | 0.29 (0.21, 0.36)    | 254                    | 0.29 (0.21, 0.36)    | 0.15 (0.03, 0.27)    |
| Log ALT, U/L           | 252                    | -0.01 (-0.05, 0.03)  | 250                    | 0.03 (-0.01, 0.07)   | 0.04 (-0.02, 0.11)   | 280                    | 0.06 (0.01, 0.10)    | 279                    | 0.05 (0.01, 0.10)    | 0.00 (-0.07, 0.07)   |
| Log hsCRP, mg/L        | 239                    | 0.69 (0.56, 0.82)    | 237                    | 0.66 (0.52, 0.80)    | 0.43 (0.21, 0.65)    | 277                    | 0.61 (0.48, 0.73)    | 276                    | 0.61 (0.48, 0.74)    | 0.55 (0.34, 0.76)    |
| Log leptin, ng/mL      | 251                    | 0.62 (0.55, 0.70)    | 249                    | 0.55 (0.48, 0.62)    | 0.19 (0.09, 0.28)    | 281                    | 0.87 (0.78, 0.96)    | 280                    | 0.86 (0.78, 0.95)    | 0.55 (0.42, 0.69)    |
| Log adiponectin, ug/mL | 252                    | -0.13 (-0.18, -0.09) | 250                    | -0.11 (-0.16, -0.06) | -0.10 (-0.18, -0.02) | 282                    | -0.12 (-0.17, -0.06) | 281                    | -0.13 (-0.18, -0.07) | -0.06 (-0.14, 0.03)  |
| <b>SAAT area SDS</b>   |                        |                      |                        |                      |                      |                        |                      |                        |                      |                      |
| Metabolic risk z-score | 232                    | 0.26 (0.21, 0.30)    | 230                    | 0.26 (0.21, 0.31)    | 0.16 (0.07, 0.25)    | 250                    | 0.33 (0.28, 0.38)    | 249                    | 0.33 (0.28, 0.38)    | 0.27 (0.19, 0.35)    |
| SBP z-score            | 371                    | 0.01 (-0.07, 0.10)   | 369                    | -0.02 (-0.11, 0.08)  | -0.14 (-0.30, 0.03)  | 363                    | 0.06 (-0.02, 0.13)   | 362                    | 0.04 (-0.03, 0.12)   | -0.05 (-0.18, 0.07)  |
| Log HDL-C, mg/dL       | 252                    | -0.06 (-0.09, -0.04) | 250                    | -0.06 (-0.09, -0.04) | -0.03 (-0.08, 0.02)  | 282                    | -0.10 (-0.13, -0.08) | 281                    | -0.11 (-0.14, -0.08) | -0.11 (-0.15, -0.06) |
| Log TG, mg/dL          | 252                    | 0.07 (0.03, 0.12)    | 250                    | 0.10 (0.05, 0.15)    | 0.12 (0.03, 0.21)    | 282                    | 0.13 (0.08, 0.18)    | 281                    | 0.14 (0.08, 0.19)    | 0.13 (0.05, 0.22)    |
| Log HOMA-IR, units     | 234                    | 0.29 (0.23, 0.34)    | 232                    | 0.26 (0.20, 0.33)    | 0.13 (0.02, 0.25)    | 255                    | 0.32 (0.24, 0.40)    | 254                    | 0.31 (0.23, 0.39)    | 0.19 (0.07, 0.32)    |
| Log ALT, U/L           | 252                    | -0.01 (-0.05, 0.03)  | 250                    | 0.04 (-0.00, 0.08)   | 0.09 (0.01, 0.17)    | 280                    | 0.06 (0.02, 0.10)    | 279                    | 0.06 (0.02, 0.10)    | 0.02 (-0.05, 0.09)   |
| Log hsCRP, mg/L        | 239                    | 0.71 (0.58, 0.84)    | 237                    | 0.73 (0.58, 0.87)    | 0.54 (0.28, 0.80)    | 277                    | 0.72 (0.60, 0.84)    | 276                    | 0.72 (0.60, 0.84)    | 0.83 (0.64, 1.02)    |
| Log leptin, ng/mL      | 251                    | 0.69 (0.63, 0.76)    | 249                    | 0.64 (0.57, 0.71)    | 0.33 (0.22, 0.44)    | 281                    | 0.94 (0.86, 1.02)    | 280                    | 0.93 (0.85, 1.01)    | 0.71 (0.59, 0.83)    |
| Log adiponectin, ug/mL | 252                    | -0.14 (-0.18, -0.09) | 250                    | -0.11 (-0.16, -0.06) | -0.10 (-0.19, 0.00)  | 282                    | -0.13 (-0.19, -0.08) | 281                    | -0.13 (-0.19, -0.08) | -0.08 (-0.16, 0.01)  |
| <b>TAAT area SDS</b>   |                        |                      |                        |                      |                      |                        |                      |                        |                      |                      |
| Metabolic risk z-score | 232                    | 0.26 (0.22, 0.31)    | 230                    | 0.26 (0.21, 0.31)    | 0.17 (0.08, 0.26)    | 250                    | 0.33 (0.28, 0.39)    | 249                    | 0.34 (0.28, 0.39)    | 0.28 (0.20, 0.37)    |
| SBP z-score            | 371                    | 0.01 (-0.07, 0.10)   | 369                    | -0.01 (-0.11, 0.08)  | -0.13 (-0.30, 0.03)  | 363                    | 0.06 (-0.02, 0.14)   | 362                    | 0.05 (-0.03, 0.13)   | -0.05 (-0.18, 0.08)  |
| Log HDL-C, mg/dL       | 252                    | -0.06 (-0.09, -0.04) | 250                    | -0.06 (-0.09, -0.04) | -0.03 (-0.08, 0.02)  | 282                    | -0.10 (-0.13, -0.07) | 281                    | -0.11 (-0.13, -0.08) | -0.11 (-0.15, -0.06) |
| Log TG, mg/dL          | 252                    | 0.08 (0.03, 0.12)    | 250                    | 0.10 (0.05, 0.15)    | 0.13 (0.04, 0.22)    | 282                    | 0.13 (0.07, 0.18)    | 281                    | 0.13 (0.08, 0.19)    | 0.13 (0.04, 0.22)    |
| Log HOMA-IR, units     | 234                    | 0.29 (0.23, 0.35)    | 232                    | 0.27 (0.20, 0.33)    | 0.15 (0.03, 0.26)    | 255                    | 0.32 (0.25, 0.40)    | 254                    | 0.32 (0.24, 0.39)    | 0.21 (0.08, 0.34)    |
| Log ALT, U/L           | 252                    | -0.01 (-0.05, 0.03)  | 250                    | 0.04 (-0.00, 0.08)   | 0.09 (0.01, 0.16)    | 280                    | 0.06 (0.02, 0.10)    | 279                    | 0.06 (0.02, 0.10)    | 0.02 (-0.05, 0.09)   |
| Log hsCRP, mg/L        | 239                    | 0.72 (0.59, 0.85)    | 237                    | 0.73 (0.59, 0.87)    | 0.57 (0.31, 0.83)    | 277                    | 0.72 (0.60, 0.84)    | 276                    | 0.73 (0.60, 0.85)    | 0.88 (0.68, 1.08)    |
| Log leptin, ng/mL      | 251                    | 0.69 (0.63, 0.76)    | 249                    | 0.64 (0.57, 0.70)    | 0.33 (0.22, 0.44)    | 281                    | 0.96 (0.88, 1.03)    | 280                    | 0.94 (0.87, 1.02)    | 0.77 (0.64, 0.89)    |
| Log adiponectin, ug/mL | 252                    | -0.14 (-0.19, -0.09) | 250                    | -0.11 (-0.17, -0.06) | -0.11 (-0.20, -0.01) | 282                    | -0.14 (-0.19, -0.08) | 281                    | -0.14 (-0.19, -0.08) | -0.08 (-0.17, 0.01)  |

*N* Obs, number of observations (same in Models 2 and 3)

Model 1. Unadjusted

Model 2. Adjusted for age, race/ethnicity, puberty score

Model 3. Additionally adjusted for BMI z-score

VAT, visceral adipose tissue; SAAT, subcutaneous abdominal adipose tissue; TAAT, total abdominal adipose tissue; SDS, standardized deviation score; SBP, systolic blood pressure; HDL-C, high-density lipoprotein cholesterol; TG, triglycerides; HOMA-IR, homeostatic model assessment of insulin resistance; ALT, alanine aminotransferase; hsCRP, high-sensitivity C-reactive protein.

**Supplementary Table S2.** Characteristics of included versus excluded study participants and their mothers in Project Viva

|                                      | Included<br>n=740  | Excluded<br>n=1388 |
|--------------------------------------|--------------------|--------------------|
|                                      | Mean (SD) or N (%) |                    |
| <b>Maternal characteristics</b>      |                    |                    |
| Age at enrollment, years             | 32.2 (5.4)         | 31.6 (5.1)         |
| Pre-pregnancy BMI, kg/m <sup>2</sup> | 25.0 (5.3)         | 24.8 (5.6)         |
| Pregnancy weight gain, kg            | 15.5 (5.4)         | 15.6 (5.8)         |
| Pregnancy smoking status, %          |                    |                    |
| Never                                | 524 (71)           | 919 (67)           |
| Former                               | 148 (20)           | 250 (18)           |
| During pregnancy                     | 66 (9)             | 200 (15)           |
| College degree or beyond, %          |                    |                    |
| No                                   | 231 (31)           | 513 (38)           |
| Yes                                  | 507 (69)           | 853 (62)           |
| Married or cohabitating, %           |                    |                    |
| No                                   | 68 (9)             | 112 (8)            |
| Yes                                  | 670 (91)           | 1253 (92)          |
| Household income >\$70,000/year, %   |                    |                    |
| No                                   | 241 (36)           | 487 (41)           |
| Yes                                  | 431 (64)           | 715 (59)           |
| <b>Child characteristics</b>         |                    |                    |
| Sex                                  |                    |                    |
| Boys                                 | 366 (49)           | 730 (53)           |
| Girls                                | 374 (51)           | 658 (47)           |
| Race/ethnicity, %                    |                    |                    |
| White                                | 462 (62)           | 880 (64)           |
| Black                                | 131 (18)           | 224 (16)           |
| Hispanic                             | 33 (4)             | 95 (7)             |
| Asian                                | 20 (3)             | 75 (5)             |
| Other                                | 93 (13)            | 96 (7)             |
| <b>Early teen characteristics*</b>   |                    |                    |
| Age, years                           | 13.0 (0.7)         | 13.9 (1.1)         |
| BMI, kg/m <sup>2</sup>               | 21.0 (4.7)         | 20.8 (4.1)         |
| WHO BMI z-score                      | 0.59 (1.28)        | 0.35 (1.13)        |
| Waist circumference, cm              | 73.1 (12.1)        | 73.1 (11.1)        |

BMI, body mass index

\*Excluded participants comprised of subset of participants with available early teen data (n=298 for age, n=294 for BMI, n=298 for waist circumference)
